D, Dodek P, Henderson WR, Hebert PC, Heritier S, Heyland DK, McArthur C, McDonald E, Mitchell I, Myburgh JA, Norton R, Potter J, Robinson BG, Ronco JJ: Intensive *versus* conventional glucose control in critically ill patients. *N Engl J Med* 2009; 360:1283-97

8. Schwinn DA, Balser JR: ANESTHESIOLOGY physician scientists in academic medicine: A wake-up call. *ANESTHESIOLOGY* 2006; 104:170-8

9. Hannenberg AA, Warner MA: The registry imperative. *ANESTHESIOLOGY* 2009; 111:687-9

10. Sessler DI: Long-term consequences of anesthetic management. *ANESTHESIOLOGY* 2009; 111:1-4

11. Devereaux PJ: Can attenuation of the perioperative stress response prevent intermediate or long-term cardiovascular outcomes among patients undergoing noncardiac surgery? *ANESTHESIOLOGY* 2009; 111:223-6

12. De Kock M: Expanding our horizons: Transition of acute postoperative pain to persistent pain and establishment of chronic postsurgical pain services. *ANESTHESIOLOGY* 2009; 111:461-3

## ■ ANESTHESIOLOGY REFLECTIONS

### Great Lakers' Anesthesia Machines

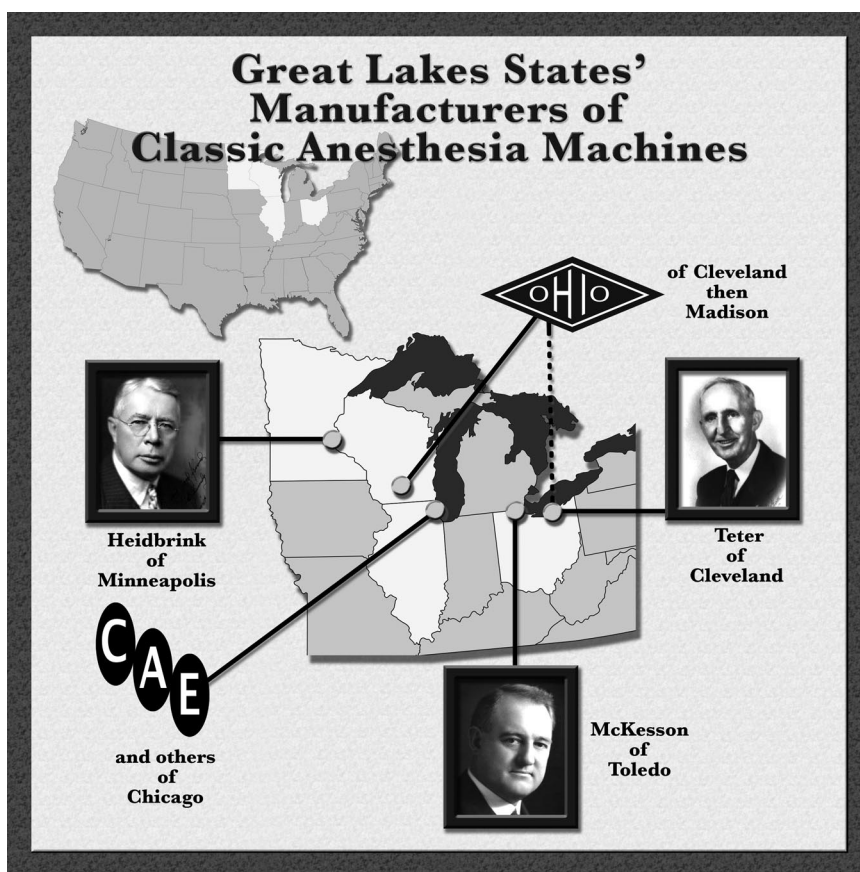

Fortunately for American anesthesia, technology for nitrous oxide-oxygen machinery developed in the wake of evolving fossil fuel and steel industries in cities around the nation's Great Lakes. Such "laughing gas machines" were produced by namesake firms founded by Teter of Cleveland, McKesson of Toledo, Heidbrink of Minneapolis, and by at least four Chicago firms. In the wake of machinery pioneered by the Philadelphia firm founded by S. S. White, Cleveland dentist Charles K. Teter (1875-1959) established America's second major line of machines. Another dentist, Jay A. Heidbrink (1875-1957), would eventually merge his namesake machinery into the "Ohio" line of anesthetic apparatus, which sidestepped changing its name to "Minnesota" (for Heidbrink) or to "Wisconsin," the state to which the company relocated after leaving Cleveland, Ohio. (Copyright © the American Society of Anesthesiologists, Inc. This image appears in color in the *Anesthesiology Reflections* online collection available at [www.anesthesiology.org](http://www.anesthesiology.org).)

George S. Bause, M.D., M.P.H., Honorary Curator, ASA's Wood Library-Museum of Anesthesiology, Park Ridge, Illinois, and Clinical Associate Professor, Case Western Reserve University, Cleveland, Ohio. [UJYC@aol.com](mailto:UJYC@aol.com).
